# Supplementary material for: A 3D-mixed ion/electron conducting scaffold prepared by in situ conversion for long-life lithium metal anodes
Source: Royal Society of Chemistry journal article supplement (doi:10.1039/d0nr06539k), 2021-01-01
Supplement: d0nr06539k1.pdf [file d0nr06539k1.pdf]

## Supporting Information

# A 3D mixed ion/electron conducting scaffold by in-situ conversion for long-life lithium metal anodes

Huai Jiang<sup>a</sup>, Qingyuan Dong<sup>a</sup>, Maohui Bai<sup>a</sup>, Furong Qin<sup>a</sup>, Maoyi Yi<sup>a</sup>, Junquan Lai<sup>a</sup>,  
Bo Hong<sup>a,\*</sup>, Yanqing Lai<sup>a,b,\*</sup>

<sup>a</sup> *School of Metallurgy and Environment, Central South University, Changsha 410083, Hunan, China*

<sup>b</sup> *Engineering Research Centre of Advanced Battery Materials, The Ministry of Education, Changsha 410083, Hunan, China*

**\*Corresponding authors.**

*Email addresses:* bop\_hong@csu.edu.cn (B. Hong), laiyanqing@csu.edu.cn (Y. Lai)

*Tel. and Fax:* +86 731 88830649

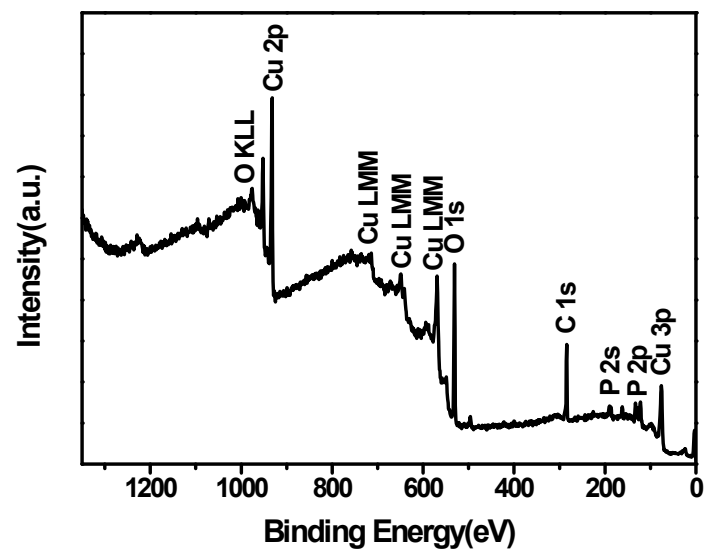

**Figure S1.** XPS full spectrum of as-synthesized Cu<sub>3</sub>P NA@CF.

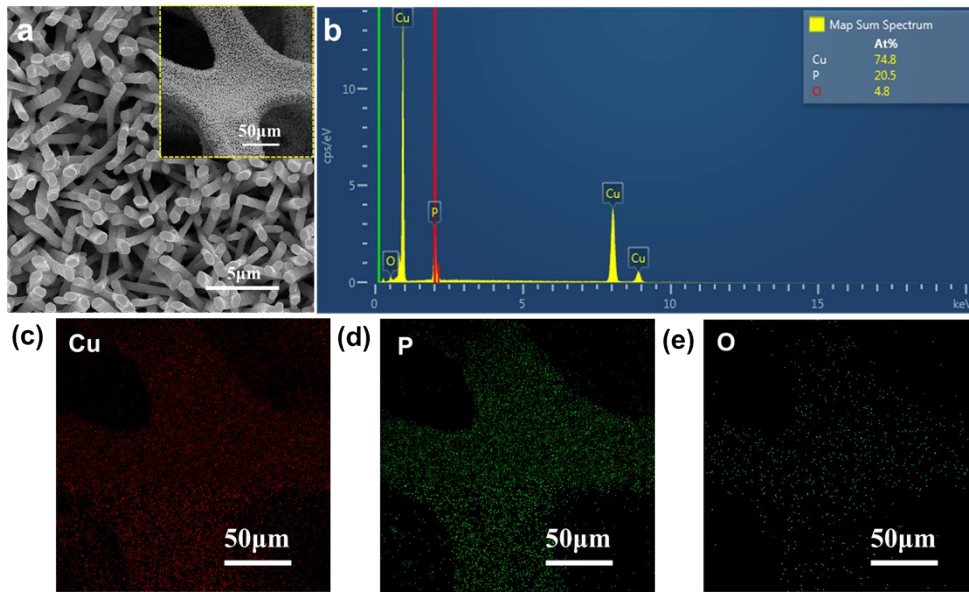

**Figure S2.** (a) SEM images of the  $\text{Cu}_3\text{P NA@CF}$  under the N/C of 1:1 at  $100^\circ\text{C}$ . (b) EDX spectrograms of  $\text{Cu}_3\text{P NA@CF}$  and corresponding elemental mapping images of Cu (c), P (d) and O (e).

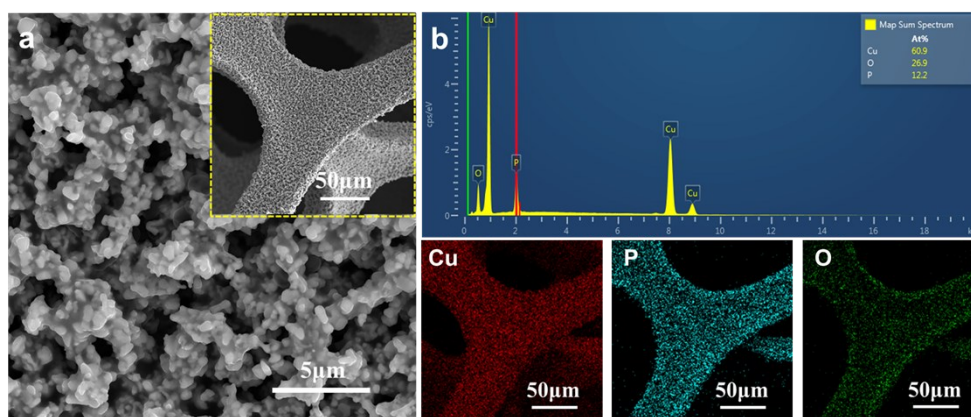

**Figure S3.** (a) SEM images of the  $\text{Cu}_3\text{P NA@CF}$  under the N/C of 1:2 at  $200^\circ\text{C}$ . (b) EDX spectrograms of  $\text{Cu}_3\text{P NA@CF}$  and corresponding elemental mapping images of Cu, P and O.

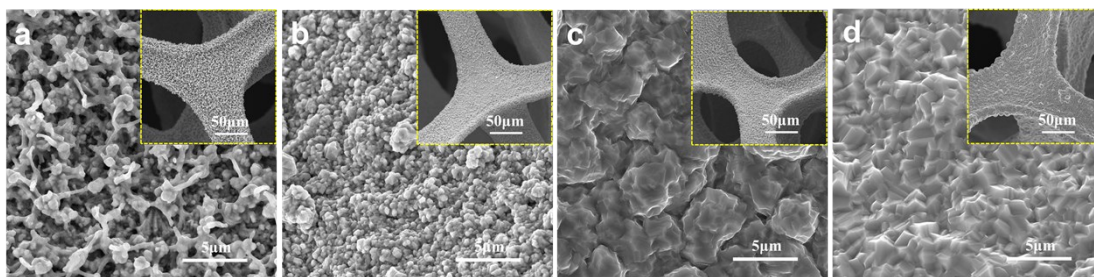

**Figure S4.** SEM image of the Cu<sub>3</sub>P NA@CF with different temperature of phosphating under the N/C of 3:1: (a) 220 °C; (b) 240 °C; (c) 260 °C; (d) 280 °C.

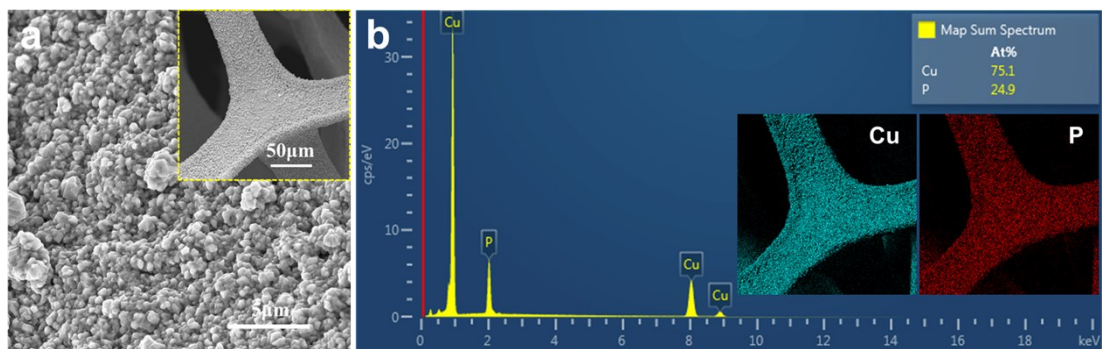

**Figure S5.** (a) SEM images of the Cu<sub>3</sub>P NA@CF under the N/C of 3:1 at 240°C. (b) EDX spectrograms of Cu<sub>3</sub>P NA@CF and corresponding elemental mapping images of Cu and P.

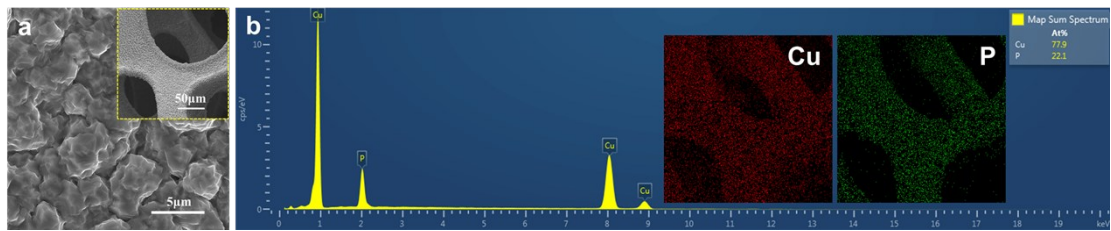

**Figure S6.** (a) SEM images of the Cu<sub>3</sub>P NA@CF under the N/C of 3:1 at 260°C. (b) EDX spectrograms of Cu<sub>3</sub>P NA@CF and corresponding elemental mapping images of Cu and P.

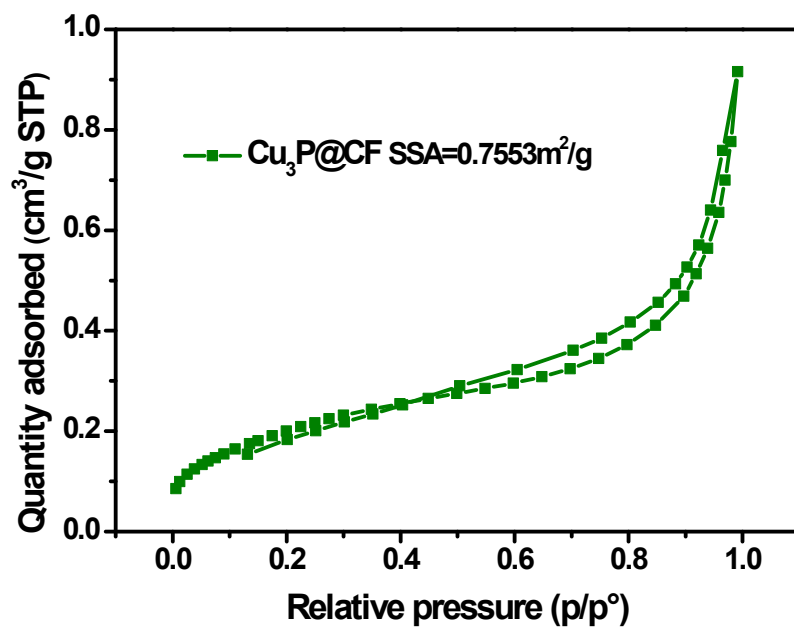

**Figure S7.** N<sub>2</sub> adsorption–desorption isotherm curve of Cu<sub>3</sub>P NA@CF under the N/C of 3:1 at 260°C.



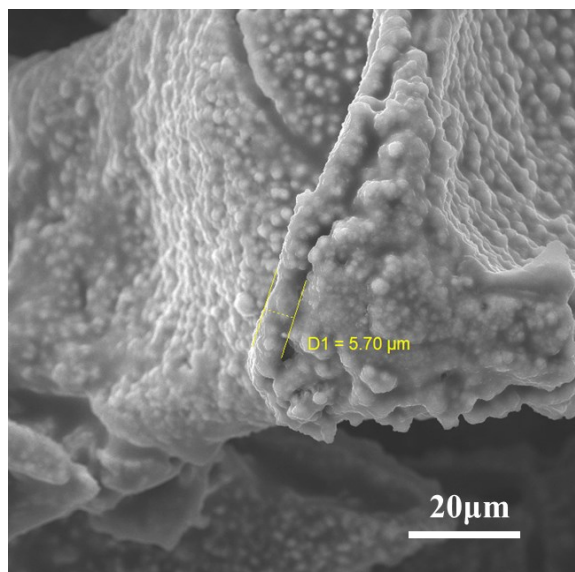

Figure S8. The thickness of Cu<sub>3</sub>P coating layer on Cu foam.

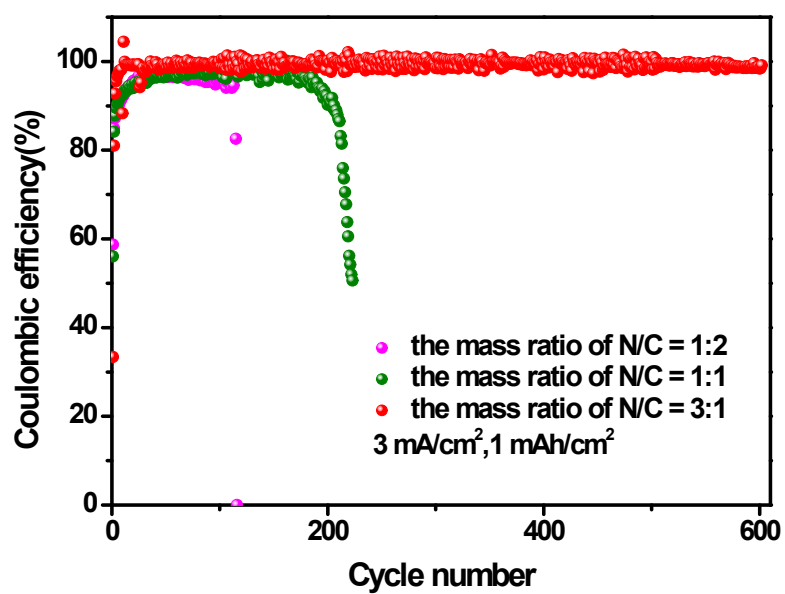

**Figure S9.** The Coulombic efficiency of  $\text{Cu}_3\text{P NA@CF}$  under the N/C of 1:2, 1:1 and 3:1 at  $3 \text{ mA cm}^{-2}$  for  $1 \text{ mAh cm}^{-2}$ .

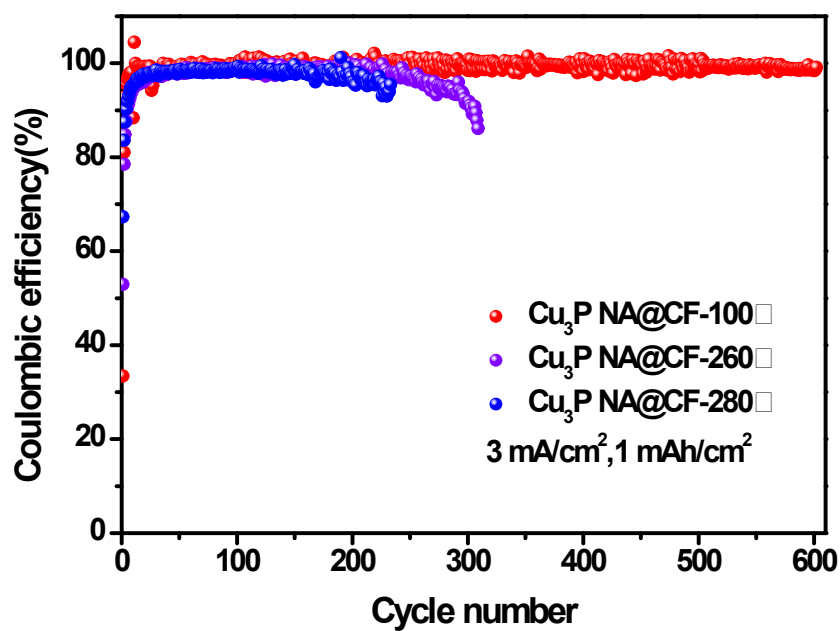

**Figure S10.** The Coulombic efficiency of the  $\text{Cu}_3\text{P NA@CF}$  with different temperature of phosphating under the N/C of 3:1 at  $3 \text{ mA cm}^{-2}$  for  $1 \text{ mAh cm}^{-2}$ .

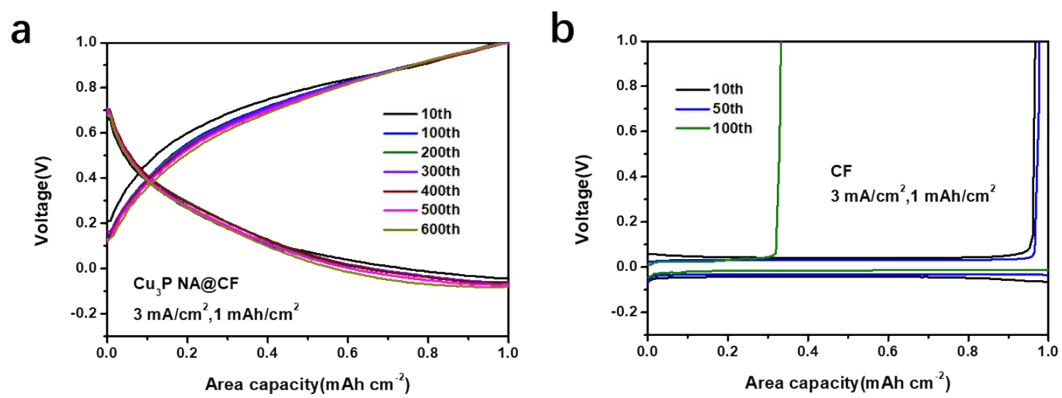

**Figure S11.** Voltage-capacity profiles for (a) PNF and (b) NF with a current density of 3 mA cm<sup>-2</sup> and a total capacity of 1 mAh cm<sup>-2</sup>.

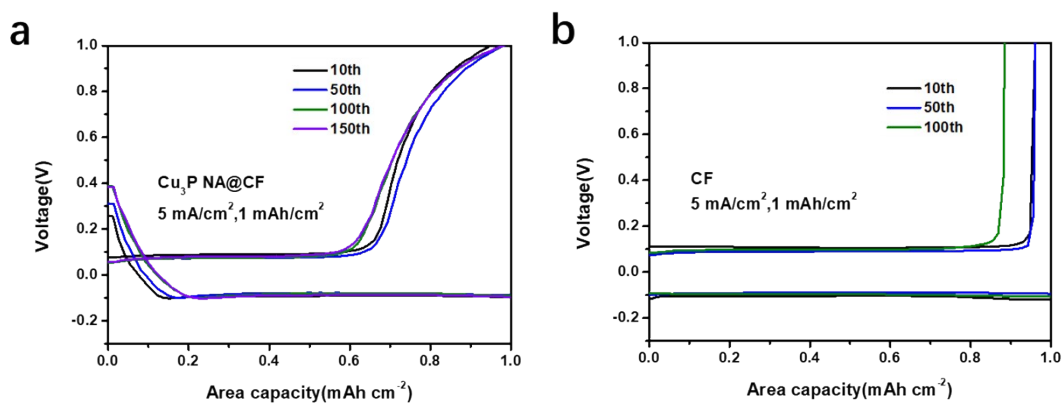

**Figure S12.** Voltage-capacity profiles for (a) PNF and (b) NF with a current density of 5 mA cm<sup>-2</sup> and a total capacity of 1 mAh cm<sup>-2</sup>.

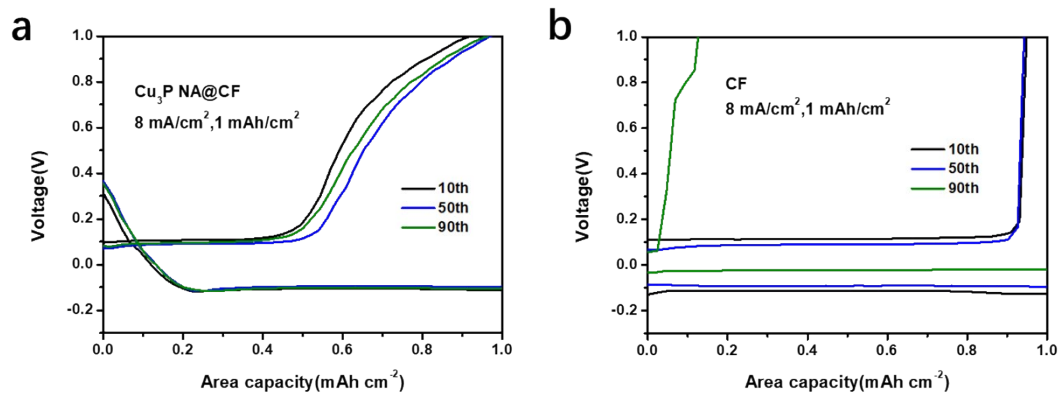

**Figure S13.** Voltage-capacity profiles for (a) PNF and (b) NF with a current density of  $8 \text{ mA cm}^{-2}$  and a total capacity of  $1 \text{ mAh cm}^{-2}$ .

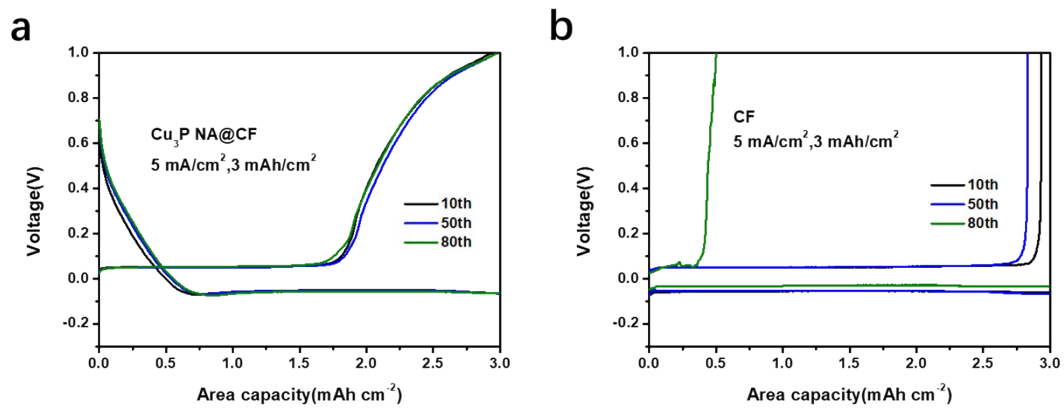

**Figure S14.** Voltage-capacity profiles for (a) PNF and (b) NF with a current density of  $5 \text{ mA cm}^{-2}$  and a total capacity of  $3 \text{ mAh cm}^{-2}$ .

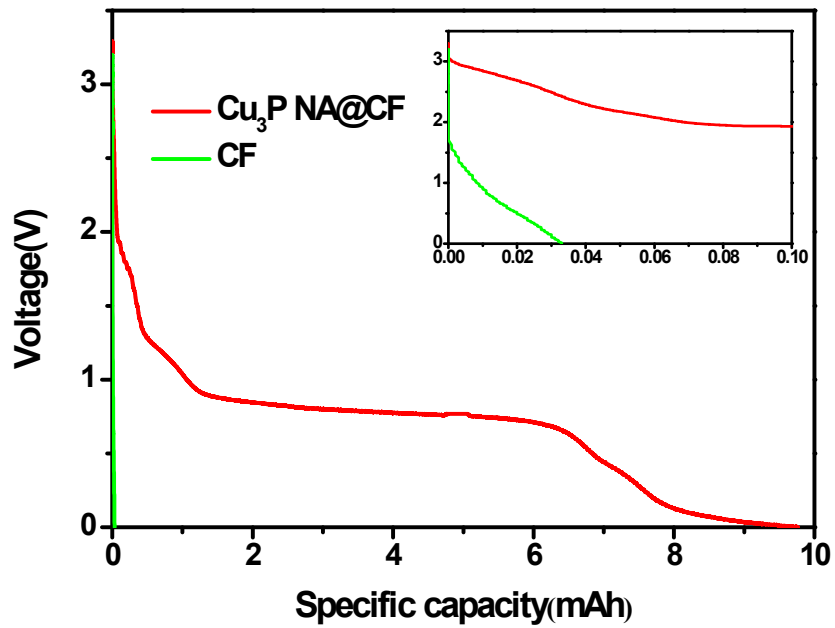

**Figure S15.** The voltage–capacity curves of  $\text{Cu}_3\text{P NA@CF}$  in the first Li deposition.

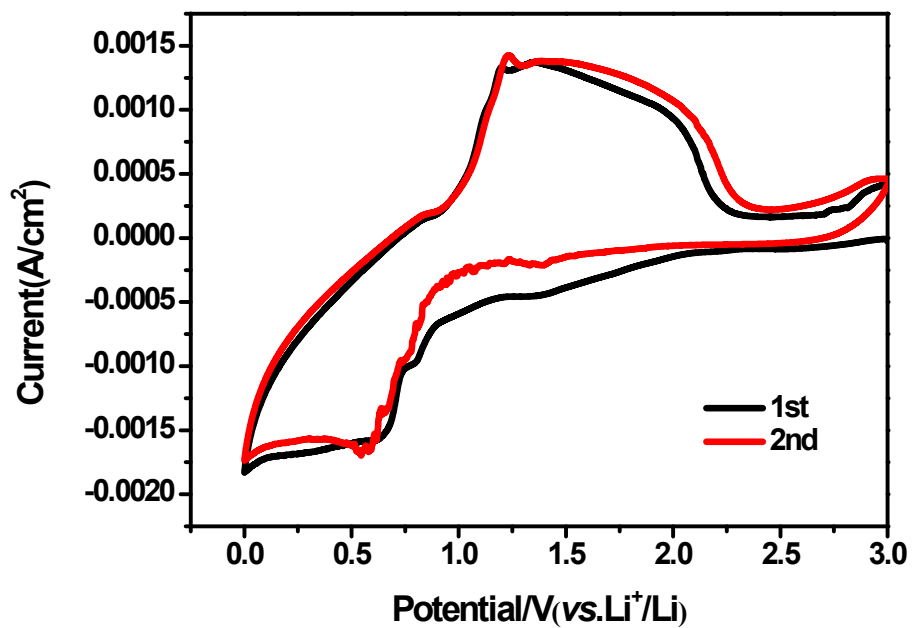

**Figure S16.** CV curves of the lithiation and delithiation of Cu<sub>3</sub>P NA@CF at a sweep speed of 0.1 mV s<sup>-1</sup> from 0.01 to 3.0 V (vs. Li<sup>+</sup>/Li).



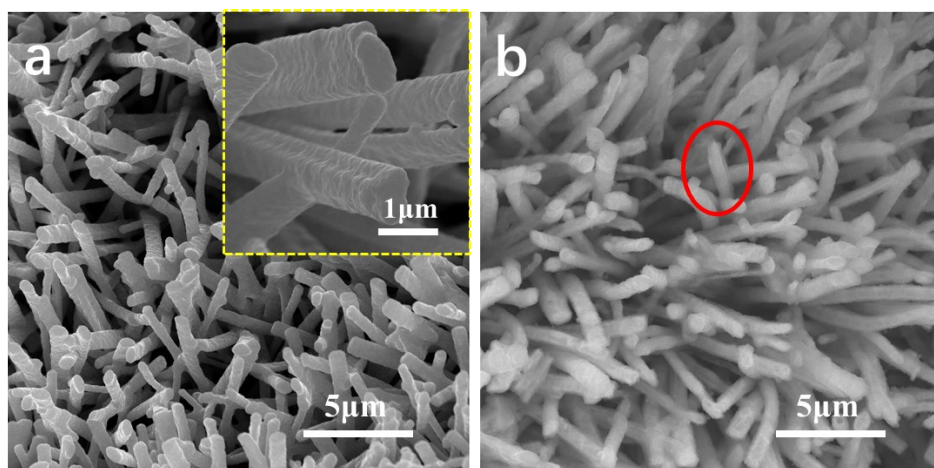

**Figure S17.** Magnification SEM images of the pristine and 200th stripping on Cu<sub>3</sub>P NA@CF at 3 mA cm<sup>-2</sup> with a total capacity of 1 mAh cm<sup>-2</sup>.

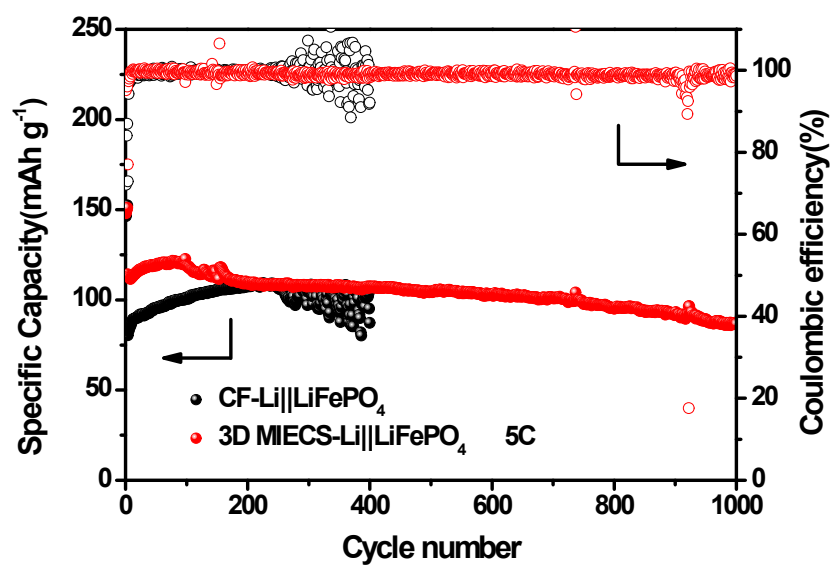

**Figure S18.** The cycling performance of 3D MIECS-Li||LiFePO<sub>4</sub> and CF-Li||LiFePO<sub>4</sub> cell at 5 C.

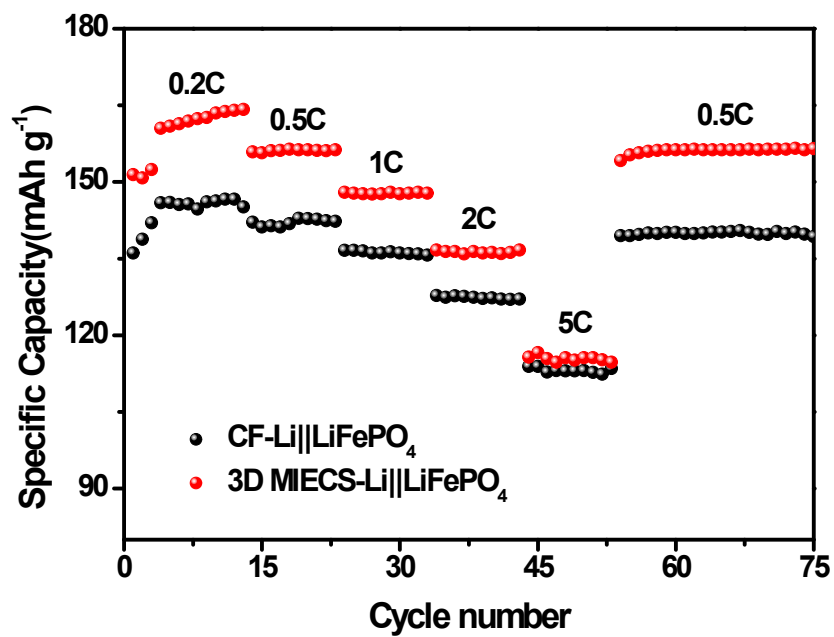

**Figure S19.** Rate performance between 3D MIECS-Li||LiFePO<sub>4</sub> and CF-Li||LiFePO<sub>4</sub> cell

## Li metal-based anodes reported recently

| Materials                                                         | Current density&Capacity                            | Cycle number | CE (%) | references |
|-------------------------------------------------------------------|-----------------------------------------------------|--------------|--------|------------|
| Unique 3D nanoporous/macroporous structure Cu current collector   | 1 mA cm <sup>-2</sup> ,<br>1 mAh cm <sup>-2</sup>   | 200          | 98     | [1]        |
| nitrogen-doped-carbon/ZnO modified Cu foam                        | 3 mA cm <sup>-2</sup> ,<br>1 mAh cm <sup>-2</sup>   | 400          | 97.6   | [2]        |
| Cu <sub>2</sub> S nanowires inside the Cu framework               | 3 mA cm <sup>-2</sup> ,<br>1 mAh cm <sup>-2</sup>   | 100          | 92     | [3]        |
| Lithiophobic-lithiophilic composite architecture                  | 1.5 mA cm <sup>-2</sup> ,<br>1 mAh cm <sup>-2</sup> | 200          | 98     | [4]        |
|                                                                   | 5 mA cm <sup>-2</sup> ,<br>3 mAh cm <sup>-2</sup>   | 50           | 96     |            |
| 3D porous Cu current collector                                    | 0.5 mA cm <sup>-2</sup> ,<br>1 mAh cm <sup>-2</sup> | 70           | 97     | [5]        |
| A self-supported, three-dimensional porous copper film            | 1 mA cm <sup>-2</sup> ,<br>1 mAh cm <sup>-2</sup>   | 97           | 120    | [6]        |
| Hierarchically Bicontinuous Porous Copper as Advanced 3D Skeleton | 3 mA cm <sup>-2</sup> ,<br>1 mAh cm <sup>-2</sup>   | 94           | 100    | [7]        |
|                                                                   | 3 mA cm <sup>-2</sup> ,<br>1 mAh cm <sup>-2</sup>   | 600          | 99.1   |            |
| A 3D mixed ion/electron conducting scaffold by in-situ conversion | 5 mA cm <sup>-2</sup> ,<br>1 mAh cm <sup>-2</sup>   | 170          | 98.2   | this work  |
|                                                                   | 5 mA cm <sup>-2</sup> ,<br>3 mAh cm <sup>-2</sup>   | 80           | 99.35  |            |

## References

- 1 H. Liu, E. Wang, Q. Zhang, Y. Ren, X. Guo, L. Wang, G. Li and H. Yu, *Energy Storage Mater.*, 2019, **17**, 253-259.
- 2 Y. Zhou, K. Zhao, Y. Han, Z. Sun, H. Zhang, L. Xu, Y. Ma and Y. Chen, *J. Mater. Chem. A*, 2019, **7**, 5712-5718.
- 3 Z. Huang, C. Zhang, W. Lv, G. Zhou, Y. Zhang, Y. Deng, H. Wu, F. Kang and Q. Yang, *J. Mater. Chem. A*, 2019, **7**, 727-732.
- 4 Y. Cheng, X. Ke, Y. Chen, X. Huang, Z. Shi and Z. Guo, *Nano Energy*, 2019, **63**, 103854.
- 5 Q. Li, S. Zhu and Y. Lu, *Adv. Funct. Mater.*, 2017, **27**, 1606422.
- 6 Y. Shi, Z. Wang, H. Gao, J. Niu, W. Ma, J. Qin, Z. Peng and Z. Zhang, *J. Mater. Chem. A*, 2019, **7**, 1092-1098.
- 7 X. Ke, Y. Cheng, J. Liu, L. Liu, N. Wang, J. Liu, C. Zhi, Z. Shi and Z. Guo, *ACS Appl. Mater. Inter.*, 2018, **10**, 13552-13561.
